# Supplementary material for: Comprehensive analysis of miRNA profiles reveals the role of Schistosoma japonicum miRNAs at different developmental stages
Source: PubMed Central journal article supplement (PMC6449929; doi:10.1186/s13567-019-0642-2), 2019-04-04
Supplement: 13567_2019_642_MOESM9_ESM.pdf [file 13567_2019_642_MOESM9_ESM.pdf]

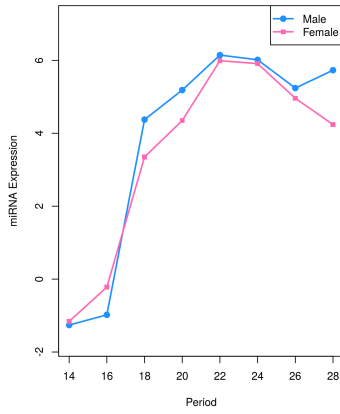

sja-miR-125a

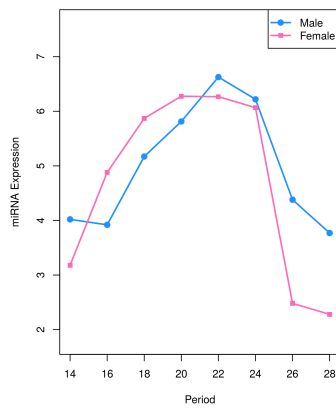

sja-miR-125b

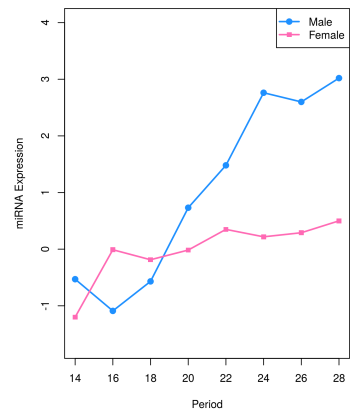

sja-miR-3487

3 miRNA (sja-miR-125a, sja-miR-125b and sja-miR-3487) all kept high expression level during 18 dpi to 22 dpi with the potential regulation ability to the reproductive development.

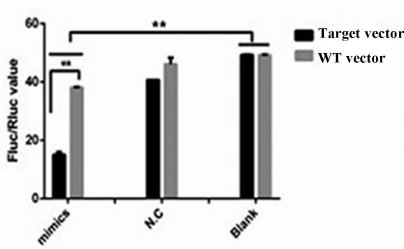

sja-miR-125a mimic + pmirGLO-target 1

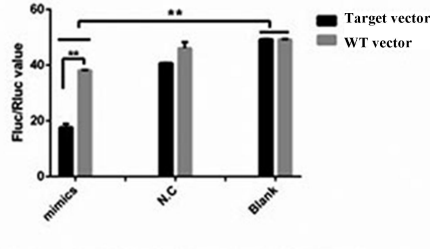

sja-miR-125a mimic + pmirGLO-target 2

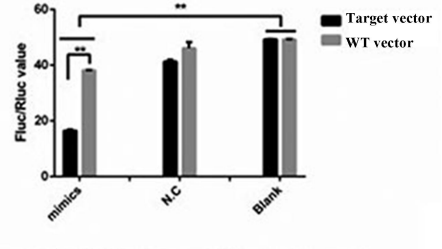

sja-miR-125b mimic + pmirGLO-target 3

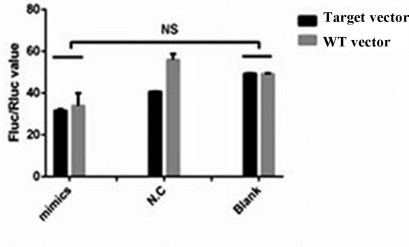

sja-miR-125b mimic + pmirGLO-target 4

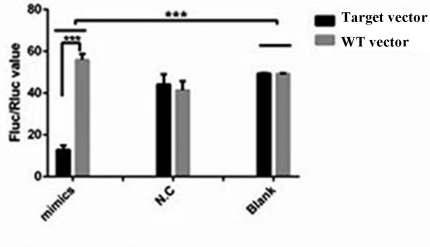

sja-miR-3487 mimic + pmirGLO-target 5

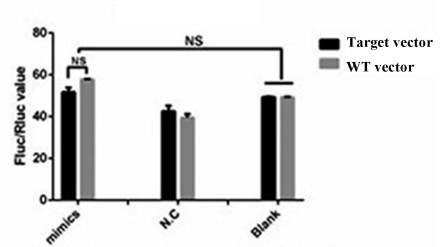

sja-miR-3487 mimic + pmirGLO-target 6

4 of 6 targets were successfully validated using dual luciferase reporter system, which illustrated that 66.67% (4/6) reliability of target prediction.
