# Supplementary material for: Comprehensive analysis of miRNA profiles reveals the role of Schistosoma japonicum miRNAs at different developmental stages
Source: PubMed Central journal article supplement (PMC6449929; doi:10.1186/s13567-019-0642-2), 2019-04-04

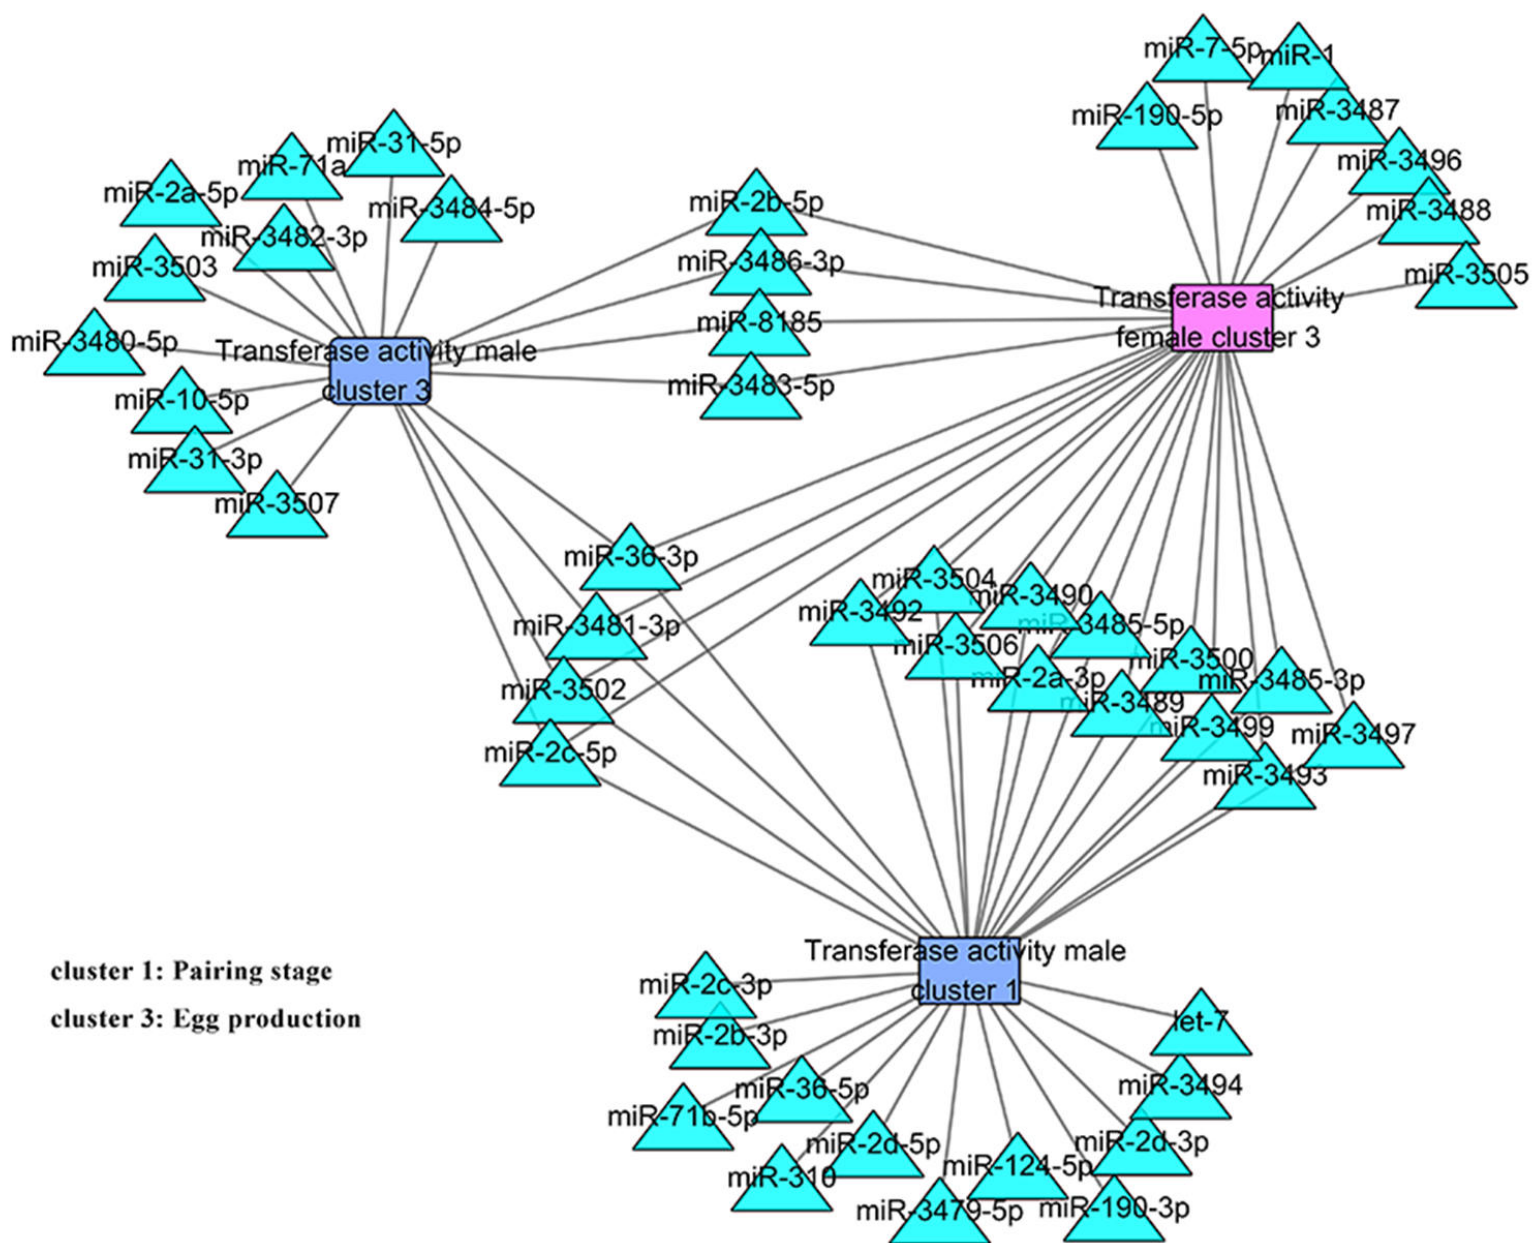

Supplement: 13567_2019_642_MOESM12_ESM.pdf [file 13567_2019_642_MOESM12_ESM.pdf]
