# Supplementary material for: Comprehensive analysis of miRNA profiles reveals the role of Schistosoma japonicum miRNAs at different developmental stages
Source: Vet Res. 2019 Apr 4;50:23. doi: 10.1186/s13567-019-0642-2 (PMC6449929; doi:10.1186/s13567-019-0642-2)
Supplement: Supplementary file 8 — Additional file 8. The number of potential targets of 79 known miRNAs predicted in RNAhybrid and miRanda. [file 13567_2019_642_MOESM8_ESM.xlsx]

## Sheet: Sheet1
Additional file 8:the number of potential targets of 79 known miRNAs predicted in miRanda and RNAhybrid.
miRNA name	number of potential targets
sja-bantam	7
sja-let-7	54
sja-miR-1	147
sja-miR-2a-3p	16
sja-miR-2a-5p	24
sja-miR-2b-3p	3
sja-miR-2b-5p	18
sja-miR-2c-3p	16
sja-miR-2c-5p	10
sja-miR-2d-3p	28
sja-miR-2d-5p	24
sja-miR-2e-3p	17
sja-miR-2e-5p	0
sja-miR-8-3p	0
sja-miR-8-5p	0
sja-miR-7-3p	2
sja-miR-7-5p	67
sja-miR-10-3p	0
sja-miR-10-5p	4
sja-miR-31-3p	11
sja-miR-31-5p	31
sja-miR-36-3p	19
sja-miR-36-5p	25
sja-miR-61	6
sja-miR-71a	20
sja-miR-71b-3p	6
sja-miR-71b-5p	10
sja-miR-124-3p	21
sja-miR-124-5p	9
sja-miR-125a	8
sja-miR-125b	4
sja-miR-133	41
sja-miR-190-3p	16
sja-miR-190-5p	11
sja-miR-219-3p	10
sja-miR-219-5p	6
sja-miR-307	0
sja-miR-277	0
sja-miR-310	5
sja-miR-2162-3p	1
sja-miR-2162-5p	1
sja-miR-3479-3p	7
sja-miR-3479-5p	44
sja-miR-3480-3p	0
sja-miR-3480-5p	14
sja-miR-3481-3p	22
sja-miR-3481-5p	9
sja-miR-3482-3p	19
sja-miR-3482-5p	19
sja-miR-3483-3p	15
sja-miR-3483-5p	43
sja-miR-3484-3p	0
sja-miR-3484-5p	7
sja-miR-3485-3p	2
sja-miR-3485-5p	51
sja-miR-3486-3p	10
sja-miR-3486-5p	5
sja-miR-3487	43
sja-miR-3488	31
sja-miR-3489	31
sja-miR-3490	52
sja-miR-3491	14
sja-miR-3492	10
sja-miR-3493	13
sja-miR-3494	17
sja-miR-3495	2
sja-miR-3496	46
sja-miR-3497	9
sja-miR-3498	5
sja-miR-3499	7
sja-miR-3500	48
sja-miR-3501	4
sja-miR-3502	15
sja-miR-3503	11
sja-miR-3504	40
sja-miR-3505	37
sja-miR-3506	8
sja-miR-3507	22
sja-miR-8185	19
